# Supplementary material for: Facile synthesis of submillimeter sized graphene oxide by a novel method
Source: Royal Society of Chemistry journal article supplement (doi:10.1039/c5ra12901j), 2015-01-01
Supplement: c5ra12901j1.pdf [file c5ra12901j1.pdf]

Electronic Supplementary Information (ESI)

## Facile synthesis of submillimeter sized graphene oxide by a novel method

Tao Xua, Qinghan Meng<sup>\*a</sup>, Tianze Shen<sup>b</sup>, Bing Cao<sup>\*b</sup>

- a. The Key Laboratory of Beijing City on Preparation and Processing of Novel Polymer Materials, Beijing University of Chemical Technology, Beijing 100029, China.  
E-mail: qhmeng@mail.buct.edu.cn (Q.H. Meng).
- b. College of Materials Science and Engineering, Beijing University of Chemical Technology, Beijing 100029, China.  
E-mail: bcao@mail.buct.edu.cn (B. Cao).

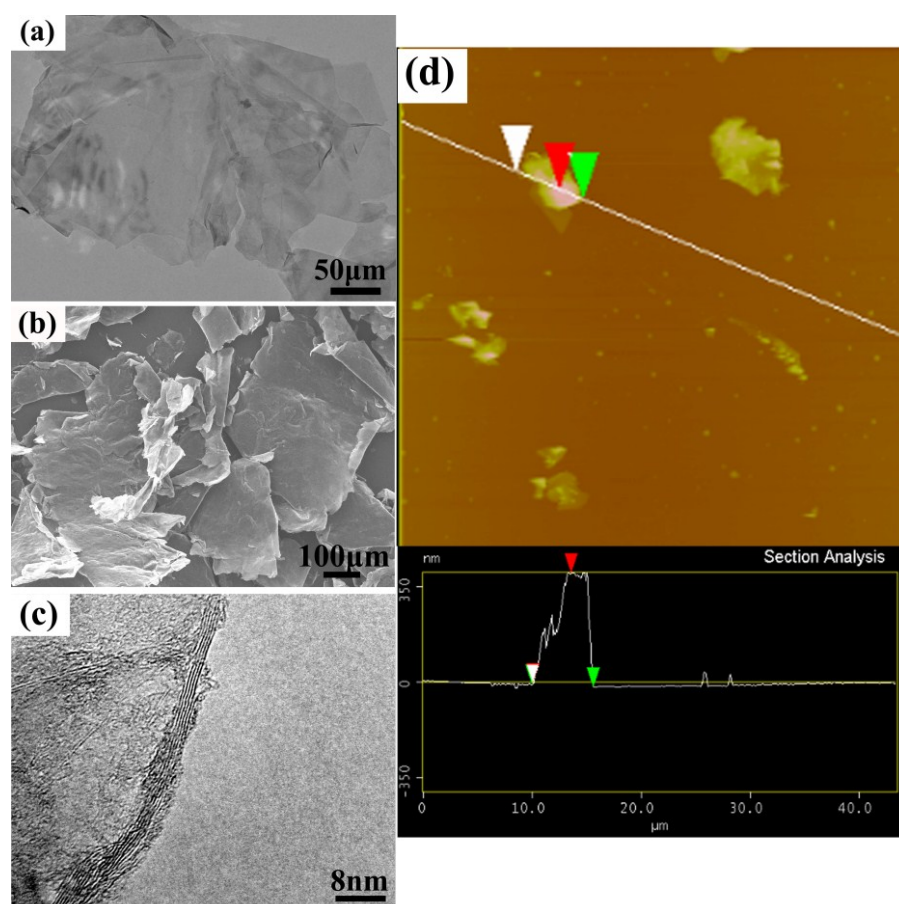

Fig. S1. (a) TEM, (b) SEM, (c) HR-TEM and (d) AFM of expanded graphite flakes after the electrochemical pre-oxidation process.

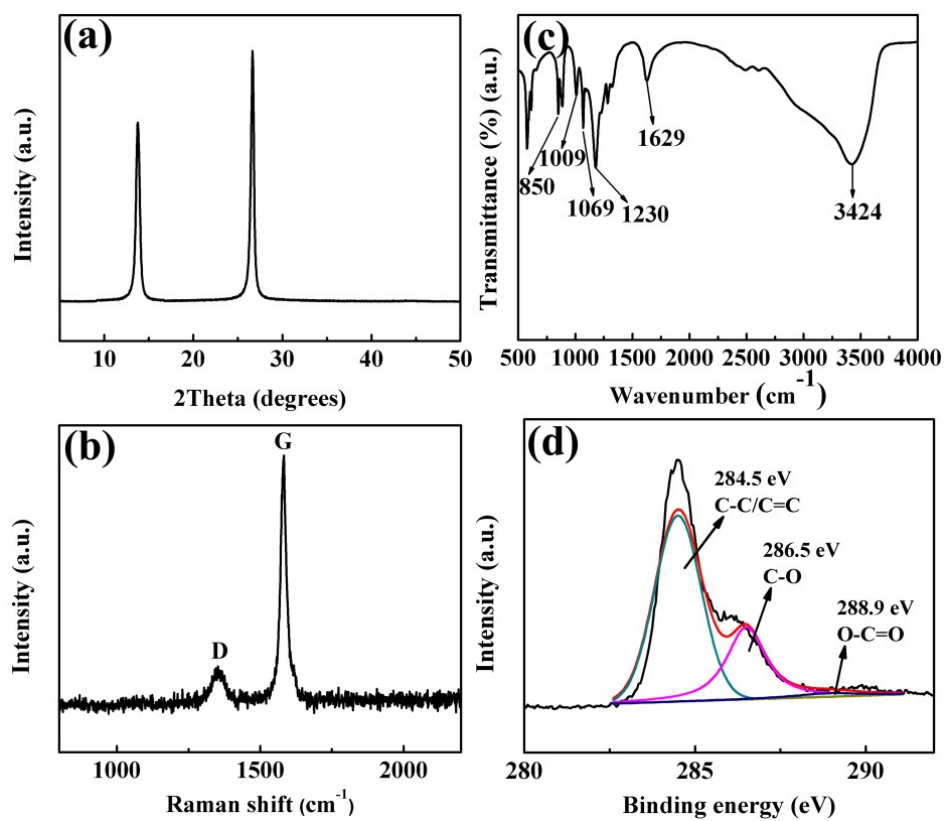

**Fig. S2. (a) XRD, (b) Raman, (c) FT-IR and (d) XPS of expanded graphite flakes after the electrochemical pre-oxidation process.**
